# Supplementary material for: New Insights into the Layering Process of Urban Environment and Private Garden Transformations: A Case Study on the Bubbling Well Road Area in Early Modern Times, Shanghai
Source: MDPI journal article supplement (doi:10.3390/su151813939), 2023-09-20
Supplement: s1 [file s1]

Archive with 1 entries (1 files):
- sustainability-2606493-supplementary.pdf
